# Supplementary material for: The corrosion behavior of borosilicate glass in the presence of cementitious waste forms
Source: Royal Society of Chemistry journal article supplement (doi:10.1039/d4dt00855c), 2024-01-01
Supplement: d4dt00855c1.pdf [file d4dt00855c1.pdf]

**The corrosion behavior of borosilicate glass in the presence of cementitious waste forms**

<sup>a</sup>Applied Research Center, Florida International University, 10555 W Flagler St, Miami, FL 33174

<sup>b</sup>Pacific Northwest National Laboratory, 902 Battelle Blvd, Richland, WA 99354

\*Corresponding author – Matthew Asmussen [matthew.asmussen@pnnl.gov](mailto:matthew.asmussen@pnnl.gov), Yelena Katsenovich [katsenov@fiu.edu](mailto:katsenov@fiu.edu)

SUPPLEMENTARY MATERIALS

Figures- 11

Tables- 4

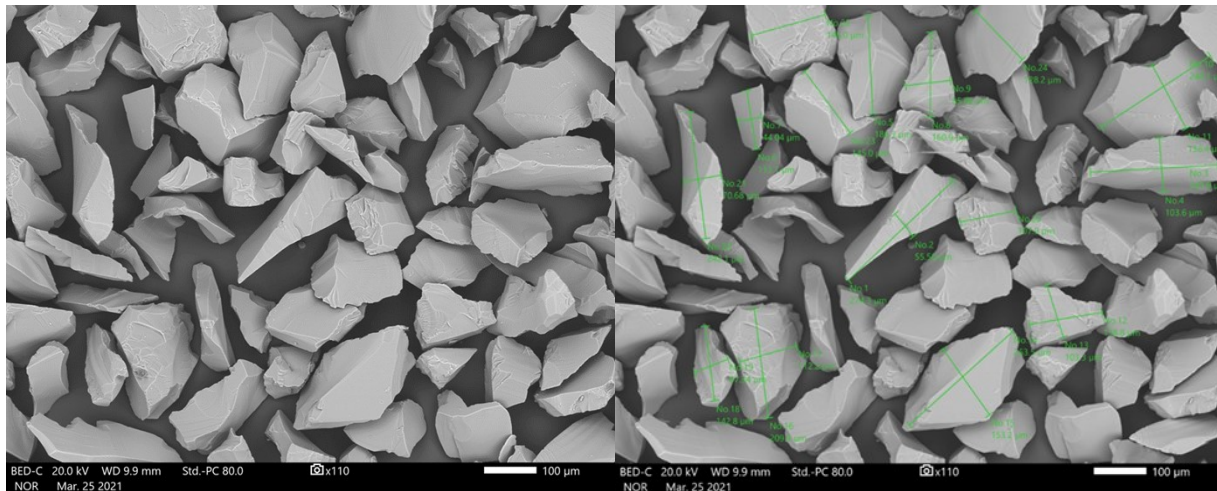

**Fig. S1** Glass powder is prepared by crushing bulk glass. The glass was crushed with agate mortar and pestle, then sieved/washed. The average particle size is -100 to +200 mesh or 74–149  $\mu\text{m}$ .

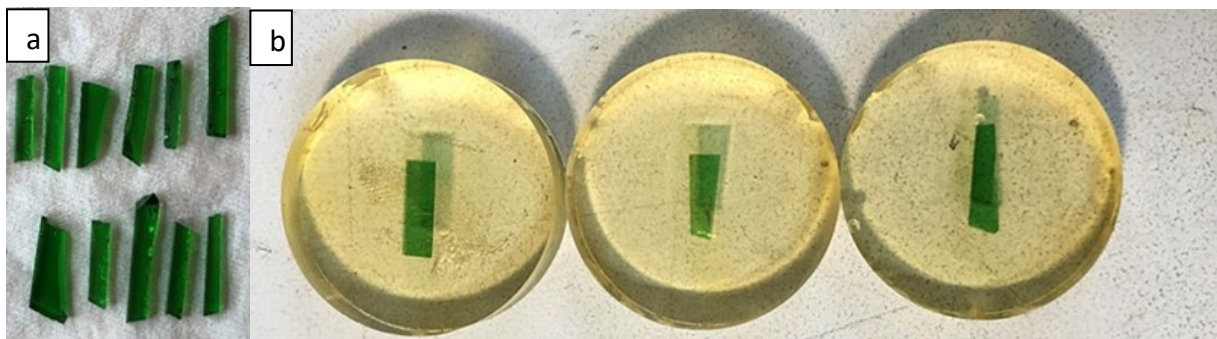

**Fig. 2S** (a) Glass coupons cut and polished for the glass characterization studies via SEM/EDS after the static experiment at 90°C; and (b) glass coupons mounted in epoxy resin and polished for cross-sectional SEM/EDS analysis.

**Table S1.** The composition of solutions measured in the PCT reactors is used for speciation modeling. The initial composition of the prepared leachate solutions is presented in Table 3.

| <i>Elements</i> | <i>pH12</i>     | <i>Si</i>       | <i>Grout</i>    | <i>Ca</i>       | <i>Ca+Si</i>    | <i>Al+Si</i>    | <i>Ca+Si +Al</i> |
|-----------------|-----------------|-----------------|-----------------|-----------------|-----------------|-----------------|------------------|
|                 | $\mu\text{g/L}$  |
| <i>B</i>        | 48,617.4        | 49,722.5        | 3,857.5         | 2,616.6         | 3,679.0         | 44,697.4        | 5,937.5          |
| <i>Si</i>       | 100,776.7       | 103,750.7       | 12,531.1        | 4,683.1         | 6,574.6         | 94,928.6        | 29,567.4         |
| <i>Ca</i>       | 338.5           | 479.4           | 84,307.2        | 81,222.0        | 70,631.9        | 575.5           | 4683.1           |
| <i>Al</i>       | 30,517.4        | 31,824.9        | 10,664.9        | 4,246.1         | 5,167.1         | 34,842.8        | 27,899.2         |
| <i>K</i>        | 37,289.1        | 40,306.4        | 2,979.4         | 3,836.4         | 5,193.3         | 35,206.1        | 24,359.0         |

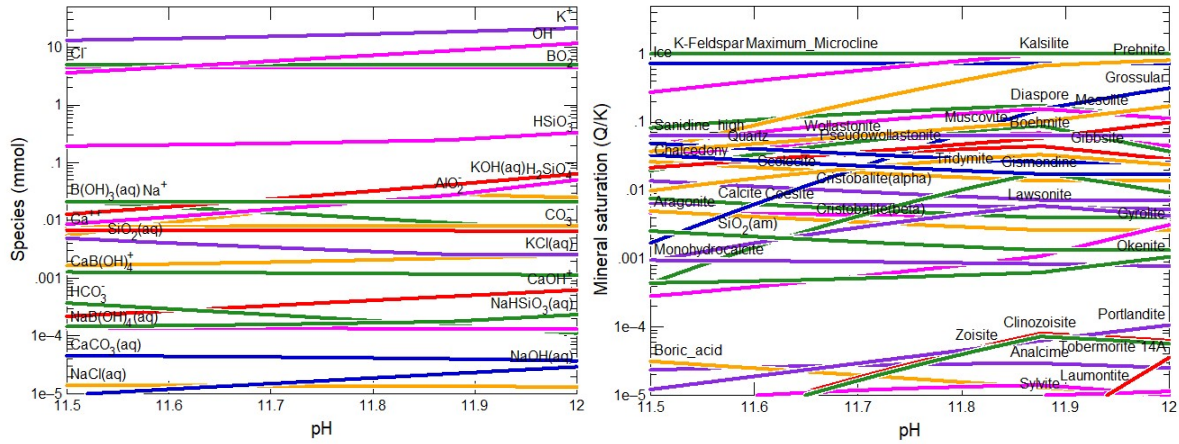

**Fig. S3** Left) Aqueous speciation in control samples at pH in the range of 11.5 – 12.0; Right) Saturated indices of possible precipitates.

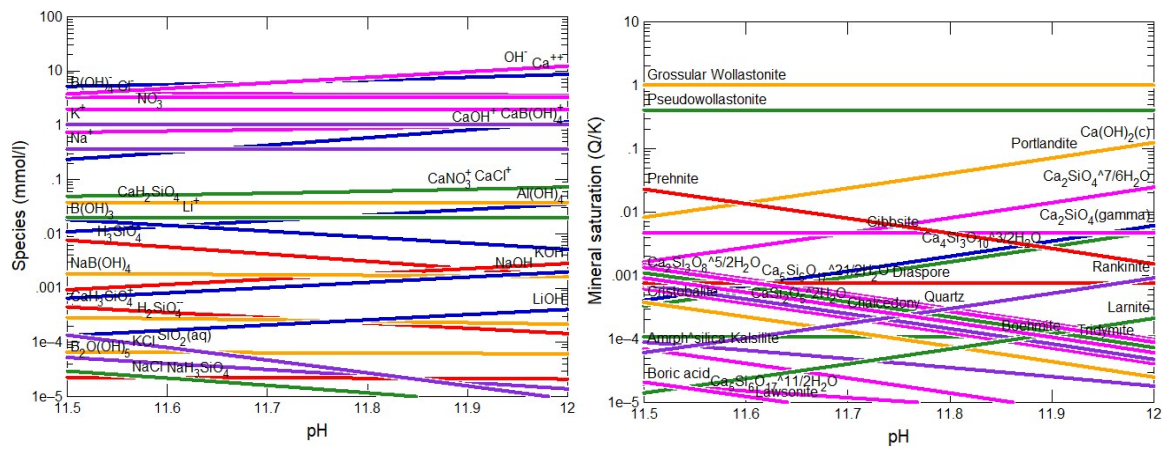

**Fig. S4** Left) Aqueous speciation at the concentrations of ions present in the leachates with an initial Si- 0.18 mM (5 mg/L) and sliding pH in the range of 11.5 – 12.0; Right) Saturated indices of possible precipitates.

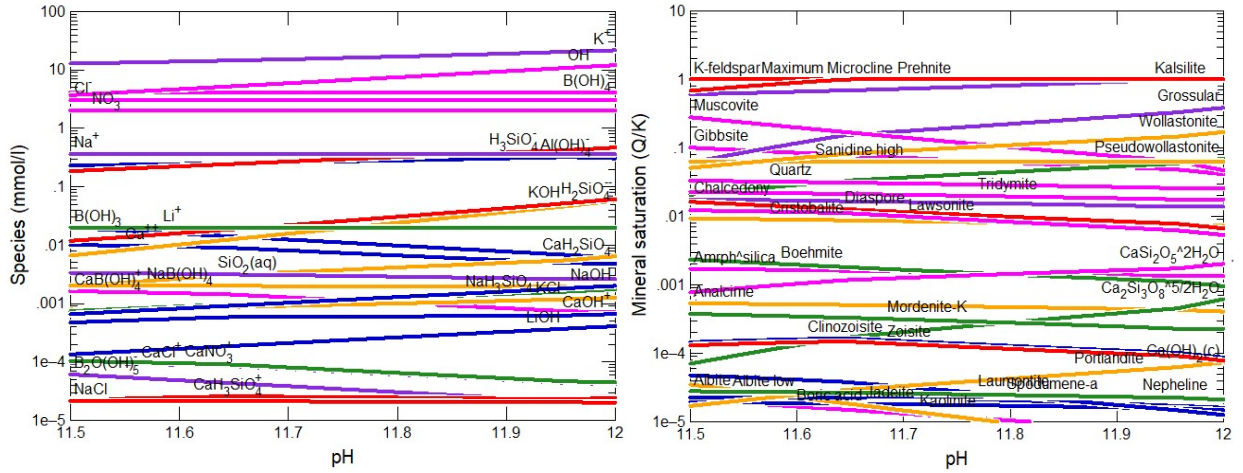

**Fig. S5** Left) Aqueous speciation at the concentrations of ions present in the leachates, Si- 0.18 mM (5 mg/L), Al-0.26 mM (7 mg/L) and sliding pH in the range of 11.5 – 12.0; Right) Saturated indices of possible precipitates.

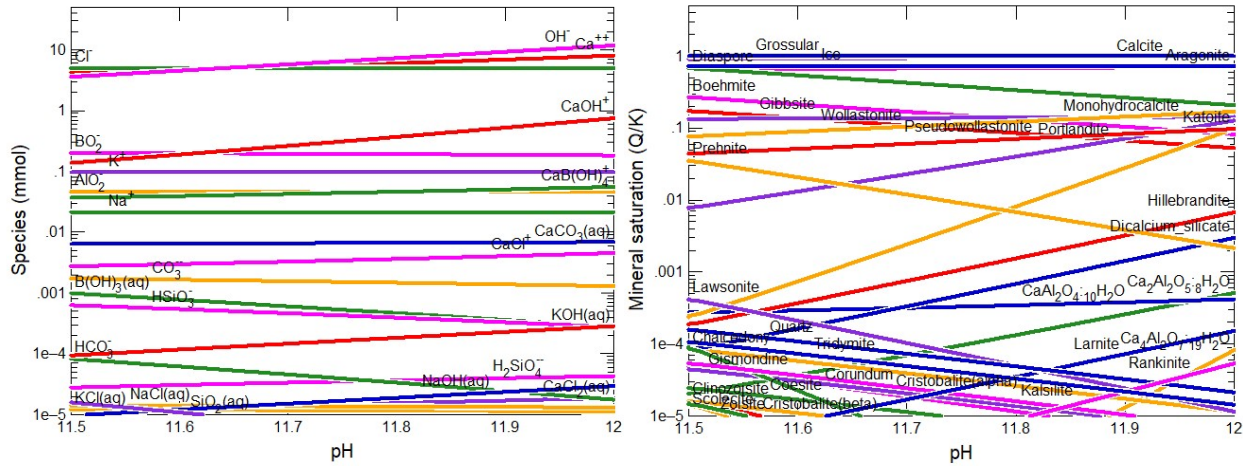

**Fig. S6** Left) Aqueous speciation at the concentrations of ions present in the leachates, with initial Ca<sup>2+</sup>-3.24 mM (130 mg/L) and sliding pH in the range of 11.5 – 12.0; Right) Saturated indices of possible precipitates.



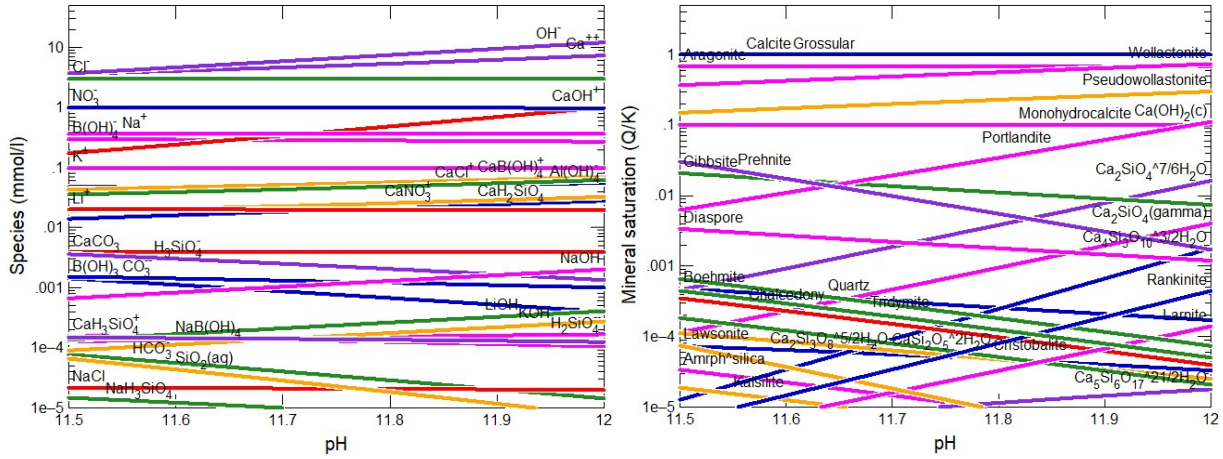

**Fig. S7** Left) Aqueous speciation at the concentrations of ions present in the leachates, with initial solution concentrations of Si- 0.18 mM (5 mg/L),  $\text{Ca}^{2+}$ -3.24 mM (130 mg/L) and sliding pH in the range of 11.5 – 12.0; Right) Saturated indices of possible precipitates.

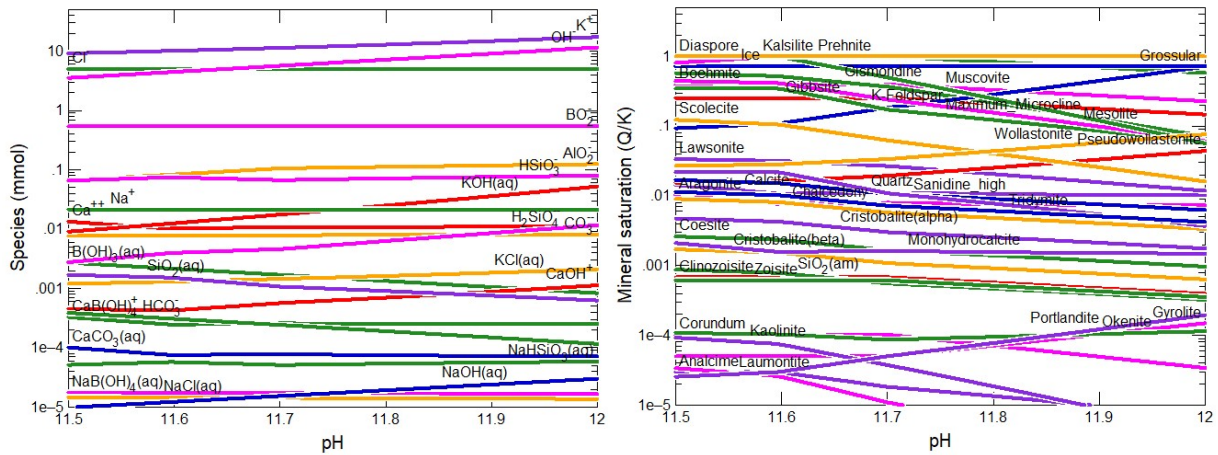

**Fig.S8** Left) Aqueous speciation at the concentrations of ions present in the leachates with initial solution concentrations of Si- 0.18 mM (5 mg/L), Al-0.26 mM (7 mg/L),  $\text{Ca}^{2+}$ -3.24 mM (130 mg/L), and sliding pH in the range of 11.5 – 12.0; Right) Saturated indices of possible precipitates.

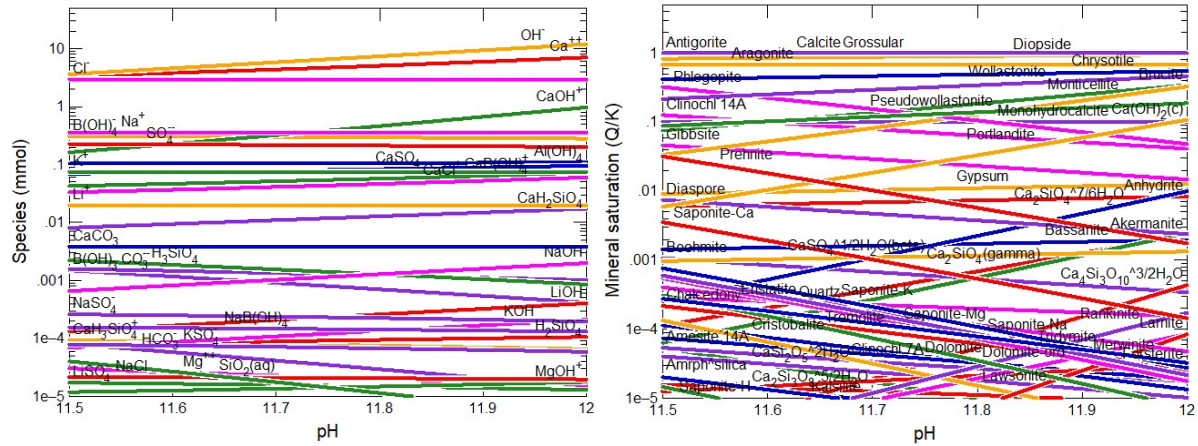

**Fig.S9** Left) Aqueous speciation at the concentrations of ions present in the leachate of a grout-contacted solution and sliding pH in the range of 11.5 – 12.0; Right) Saturated indices of possible precipitates.

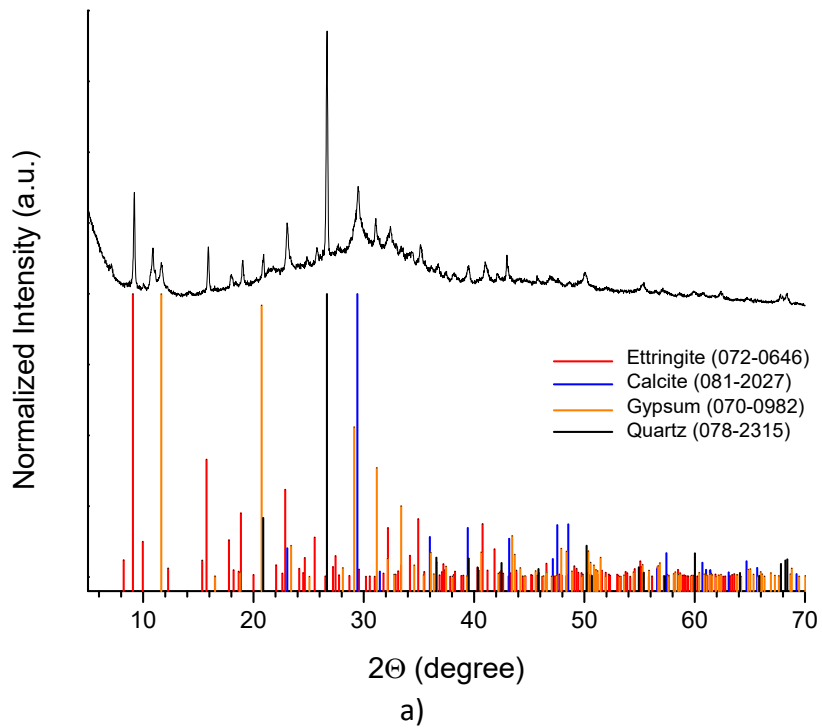

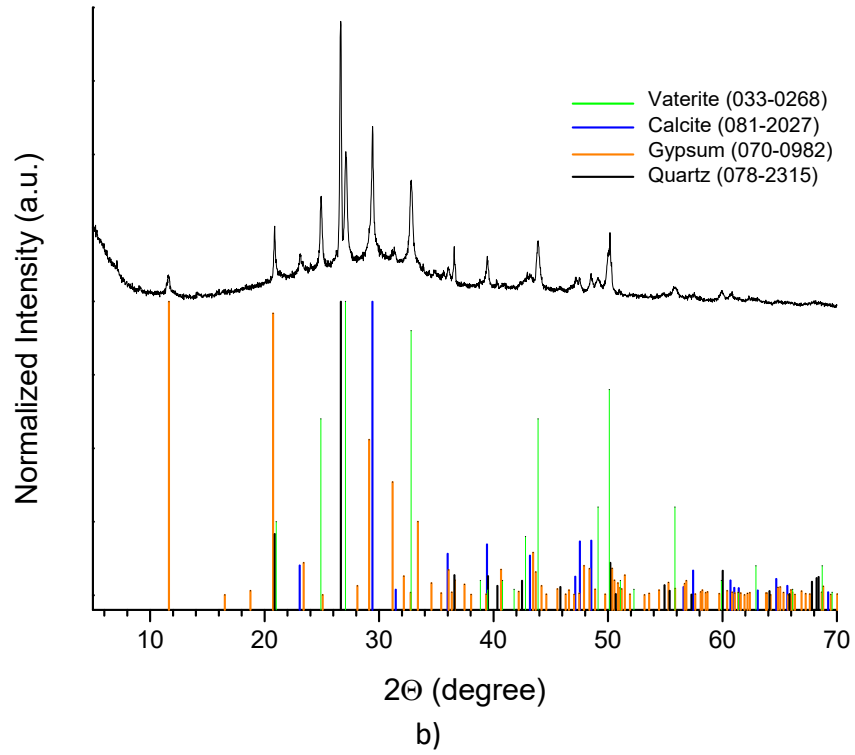

**Fig. S10** (a) XRD patterns of as received and (b) water treated grout powders.

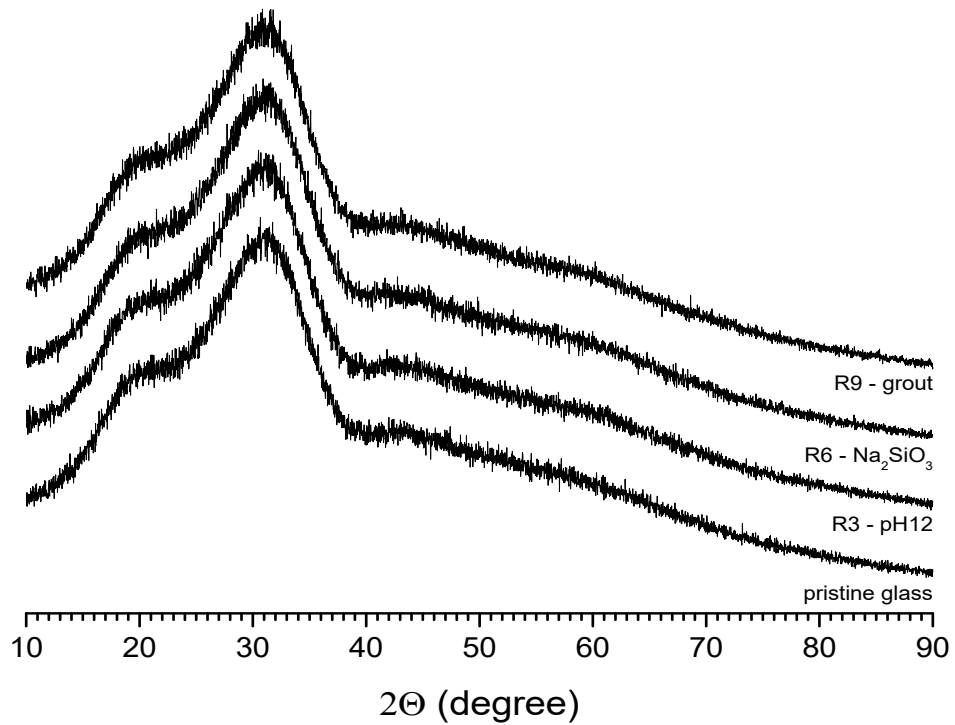

**Fig. S11** XRD patterns of the powder pristine and treated glass in the static experiment at 90 °C.

**Table S2** Phase composition of as received and water-contacted grout powders according to XRD analysis.

| Phase                                                                                                               | As received<br>grout, wt. % | Water-contacted<br>grout, wt. % |
|---------------------------------------------------------------------------------------------------------------------|-----------------------------|---------------------------------|
| Calcite (CaCO <sub>3</sub> )                                                                                        | 11.1                        | 17.0                            |
| Vaterite (CaCO <sub>3</sub> )                                                                                       | 0                           | 52.0                            |
| Gypsum (CaSO <sub>4</sub> ·2H <sub>2</sub> O)                                                                       | 16.3                        | 8.5                             |
| Quartz (SiO <sub>2</sub> )                                                                                          | 30.2                        | 22.5                            |
| Ettringite (Ca <sub>6</sub> Al <sub>2</sub> (SO <sub>4</sub> ) <sub>3</sub> (OH) <sub>12</sub> ·26H <sub>2</sub> O) | 42.3                        | 0                               |

**Table S3** pH of solutions before and after static PCT

| Solution                | Initial pH | pH after<br>static PCT |
|-------------------------|------------|------------------------|
| pH 12 buffer            | 11.95      | 11.73                  |
| Grout-contacted         | 11.78      | 11.64                  |
| Si-amended              | 11.94      | 11.73                  |
| Ca-amended              | 12.1       | 11.97                  |
| Ca- and Si-amended      | 12.13      | 11.85                  |
| Al- and Si-amended      | 12.01      | 11.79                  |
| Ca-, Al- and Si-amended | 11.97      | 11.78                  |

**Table S4** Surface composition of pure glass powder and glass powders treated in pH 12 buffer, grout-contacted and Ca-amended solutions in PCT (7 days at 90°C) according to EDS analysis. Note: The average concentrations of elements were calculated based on the composition obtained from at least 10 single points.

| Element                                    | Pure glass<br>wt. % | pH 12 buffer<br>wt. % | Grout-contacted<br>wt. % | Ca-amended<br>wt. % |
|--------------------------------------------|---------------------|-----------------------|--------------------------|---------------------|
| Magnesium (MgO)                            | 0.39 ± 0.23         | 0.43 ± 0.1            | 0.44 ± 0.1               | 0.42 ± 0.1          |
| Aluminum (Al <sub>2</sub> O <sub>3</sub> ) | 4.38 ± 0.66         | 4.77 ± 0.4            | 4.98 ± 0.3               | 4.78 ± 0.6          |
| Silicon (SiO <sub>2</sub> )                | 19.81 ± 1.72        | 21.18 ± 1.5           | 20.23 ± 1.2              | 20.45 ± 1.8         |
| Calcium (CaO)                              | 2.69 ± 0.97         | 2.30 ± 0.5            | 2.07 ± 0.6               | 2.73 ± 0.7          |
| Iron (Fe <sub>2</sub> O <sub>3</sub> )     | 0.54 ± 0.20         | 0.56 ± 0.2            | 0.55 ± 0.3               | 0.55 ± 0.1          |
| Sodium (Na <sub>2</sub> O)                 | 10.83 ± 2.57        | 8.97 ± 1.3            | 12.06 ± 1.4              | 9.96 ± 2.3          |
| Potassium (K <sub>2</sub> O)               | 0.86 ± 0.30         | 0.62 ± 0.1            | 0.72 ± 0.3               | 0.70 ± 0.2          |
| Zinc (Zn)                                  | 2.24 ± 1.65         | 2.58 ± 1.4            | 2.33 ± 1.0               | 1.48 ± 1.2          |
| Zirconium (ZrO <sub>2</sub> )              | 7.59 ± 1.51         | 7.72 ± 0.5            | 6.89 ± 0.8               | 6.95 ± 0.3          |
| Titanium (TiO <sub>2</sub> )               | 0.50 ± 0.26         | 0.45 ± 0.1            | 0.41 ± 0.2               | 0.53 ± 0.53         |
| Boron (B <sub>2</sub> O <sub>3</sub> )     | 11.70 ± 2.69        | 13.17 ± 2.6           | 12.60 ± 2.1              | 12.99 ± 1.7         |
